# Supplementary material for: Macrophage Jak2 deficiency accelerates atherosclerosis through defects in cholesterol efflux
Source: PubMed Central journal article supplement (PMC8847578; doi:10.1038/s42003-022-03078-5), 2022-02-15
Supplement: 42003_2022_3078_MOESM2_ESM.pdf [file 42003_2022_3078_MOESM2_ESM.pdf]

## Description of Additional Supplementary Files

**File name:** Supplementary Data 1

**Description:** The source data behind the graphs in the paper.
